# Supplementary material for: Porphyrin N-Pincer Pd(II)-Complexes in Water: A Base-Free and Nature-Inspired Protocol for the Oxidative Self-Coupling of Potassium Aryltrifluoroborates in Open-Air
Source: MDPI journal article supplement (doi:10.3390/molecules26175390), 2021-09-04

# Porphyrin *N*-Pincer Pd(II)-Complexes in Water: A Base-Free and Nature-Inspired Protocol for the Oxidative Self-Coupling of Potassium Aryltrifluoroborates in Open-Air

Sana Siva Prasad<sup>1</sup>, Bandameeda Ramesh Naidu<sup>1</sup>, Marlia M. Hanafiah<sup>2,3</sup>, Jangam Lakshmid devi<sup>1</sup>, Ravi Kumar Marella<sup>4</sup>, Sivarama Krishna Lakkaboyana<sup>5</sup> and Katta Venkateswarlu<sup>1,\*</sup>

<sup>1</sup> Laboratory for Synthetic & Natural Products Chemistry, Department of Chemistry, Yogi Vemana University, Kadapa 516005, India; sana.chemist009@gmail.com (S.S.P.); brameshnaidu94@gmail.com (B.R.N.); devi703244@gmail.com (J.L.)

<sup>2</sup> Department of Chemistry, Faculty of Science and Technology, Universiti Kebangsaan Malaysia, Bangi 43600, Selangor, Malaysia; mhmarlia@ukm.edu.my

<sup>3</sup> Centre for Tropical Climate Change System, Institute of Climate Change, Universiti Kebangsaan Malaysia, Bangi 43600, Selangor, Malaysia

<sup>4</sup> Department of Mechanical Engineering, PACE Institute of Technology & Sciences, Ongole 523272, India; ravikumar.marella@pace.ac.in

<sup>5</sup> Department of Chemical Technology, Chulalongkorn University, Pathumwam, Bangkok, Thailand; svurams@gmail.com

\* Correspondence: kvenkat@yogivemanauniversity.ac.in; Tel.: +91-7989951388

## Copies of $^1\text{H}$ & $^{13}\text{C}$ NMR Spectra of symmetrical biaryls:

$^1\text{H}$  NMR spectrum of **6a**:

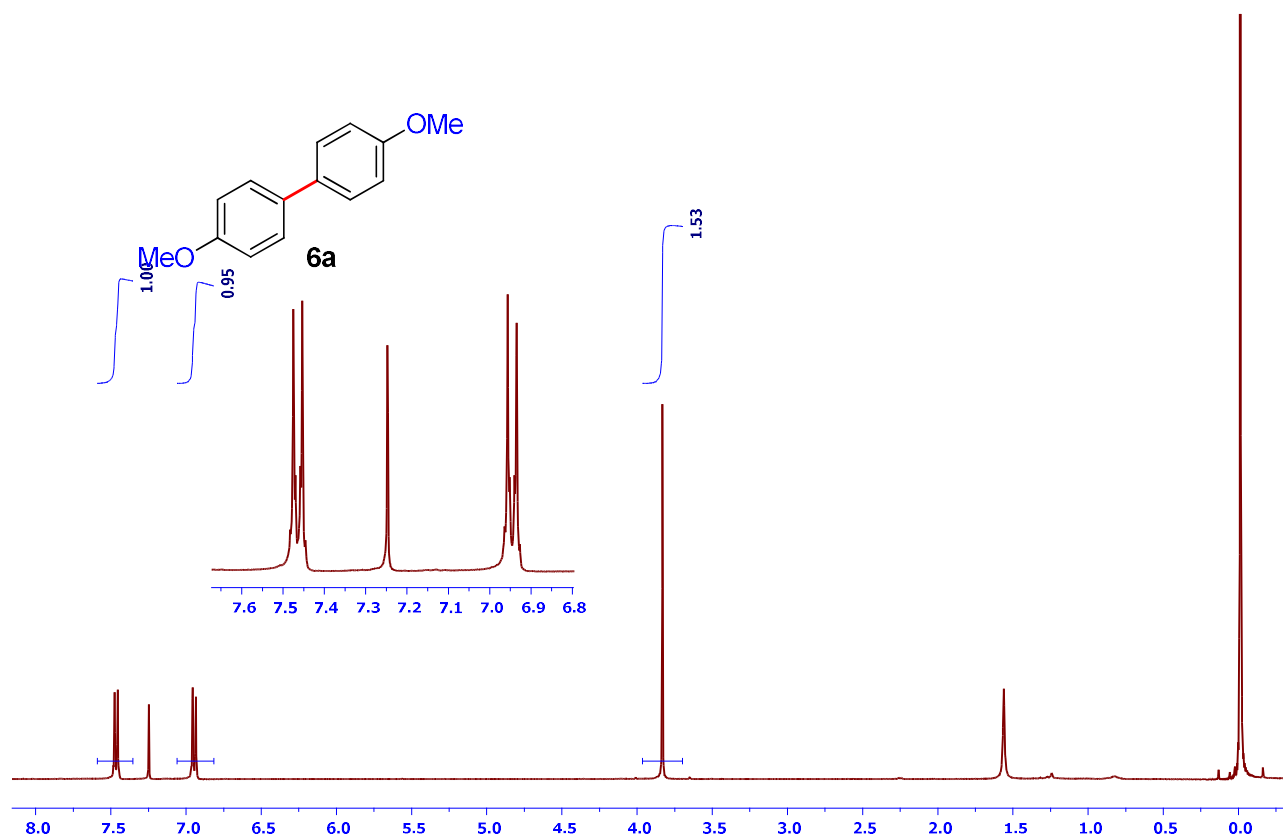

$^{13}\text{C}$  NMR spectrum of **6a**:

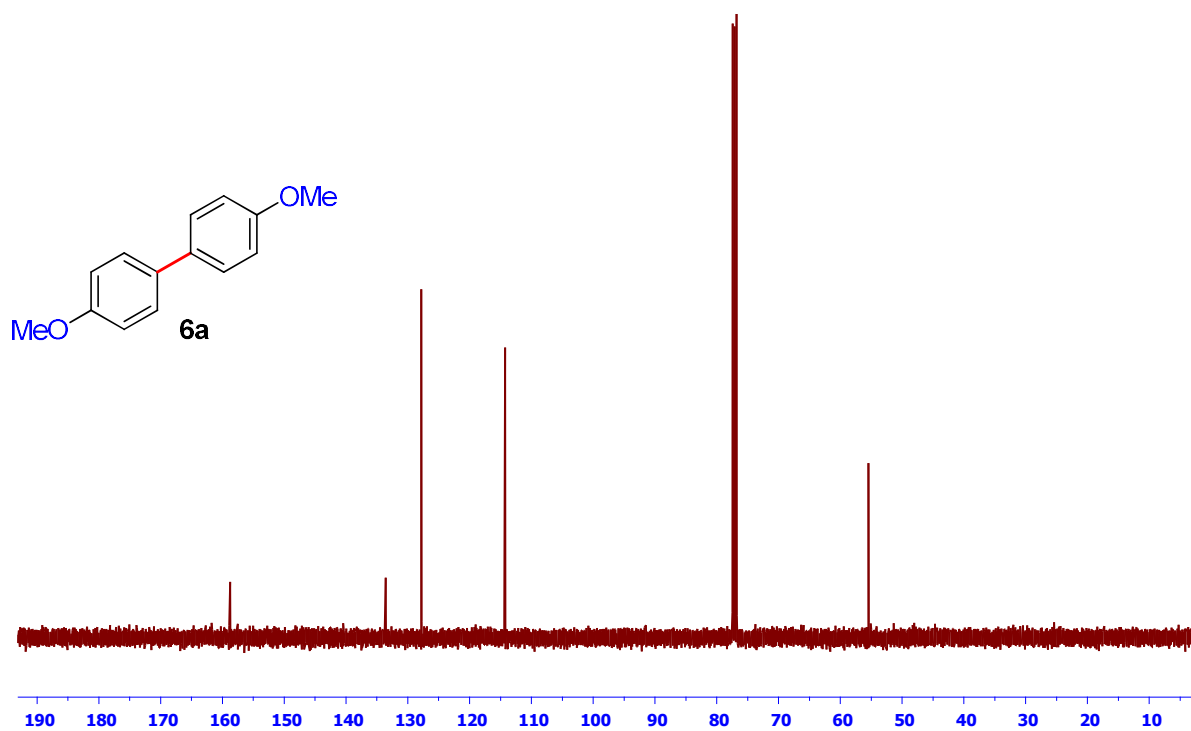

$^1\text{H}$  NMR spectrum of **6e**:

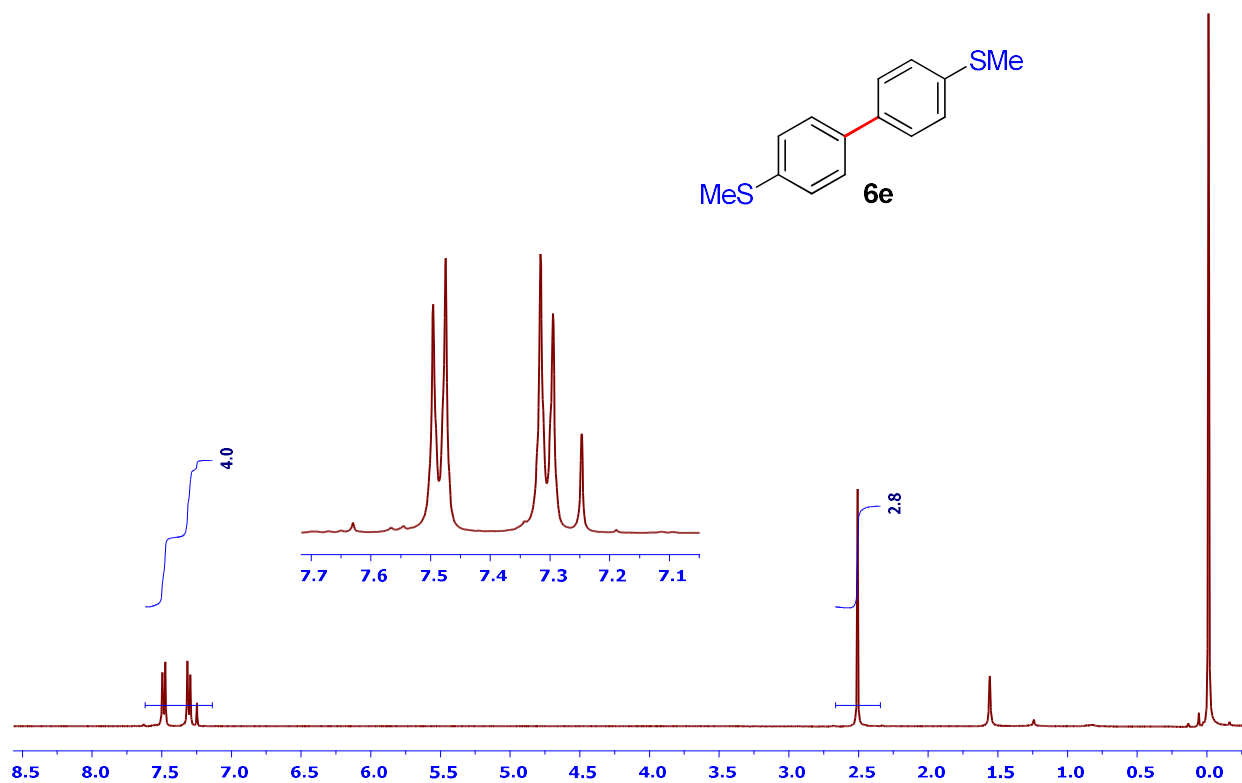

$^{13}\text{C}$  NMR spectrum of **6e**:

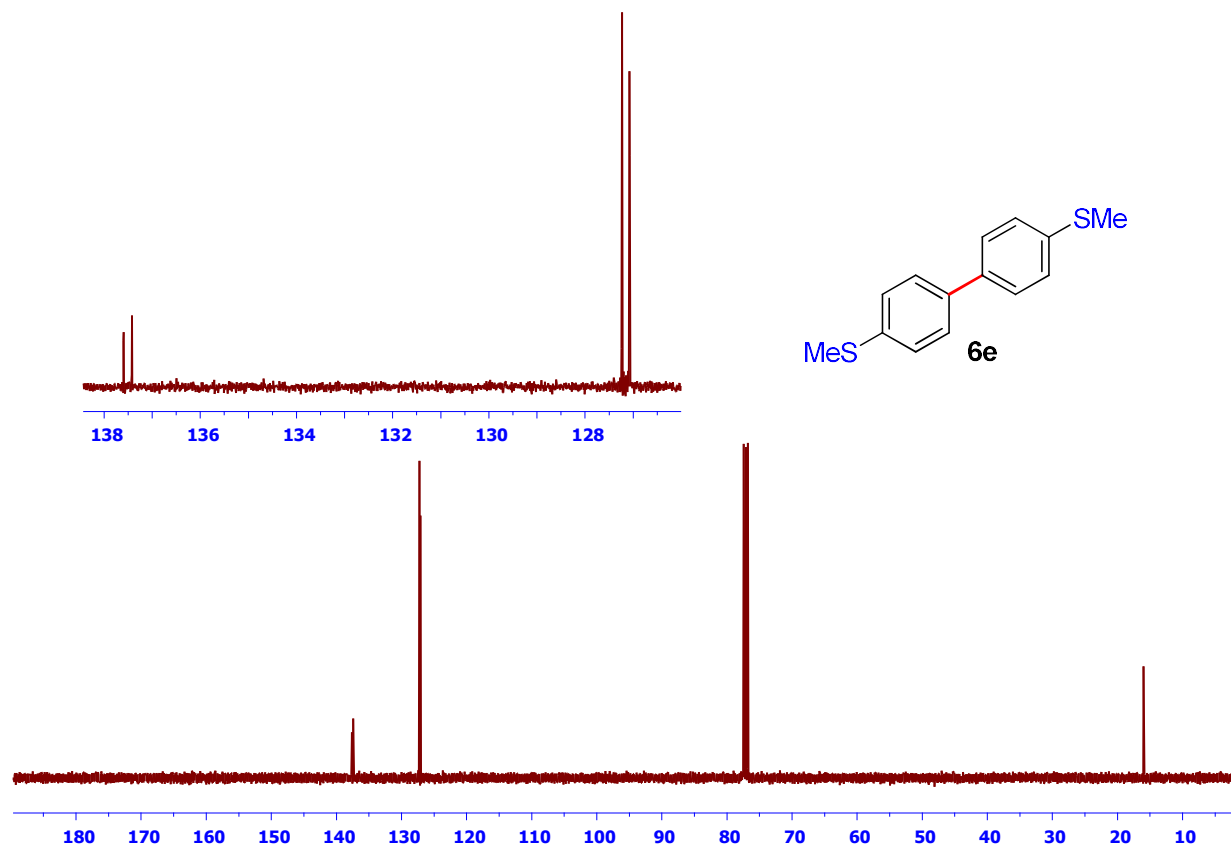

$^1\text{H}$  NMR spectrum of **6f**:

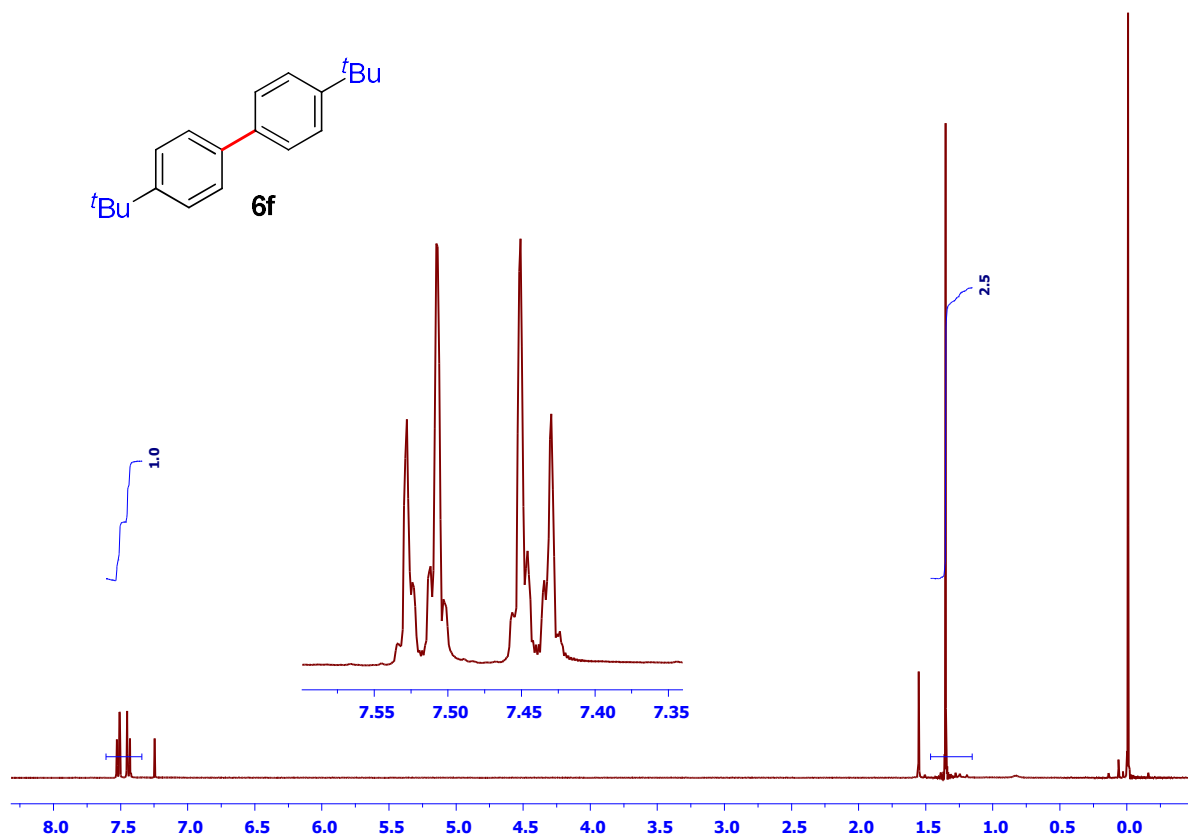

$^{13}\text{C}$  NMR spectrum of **6f**:

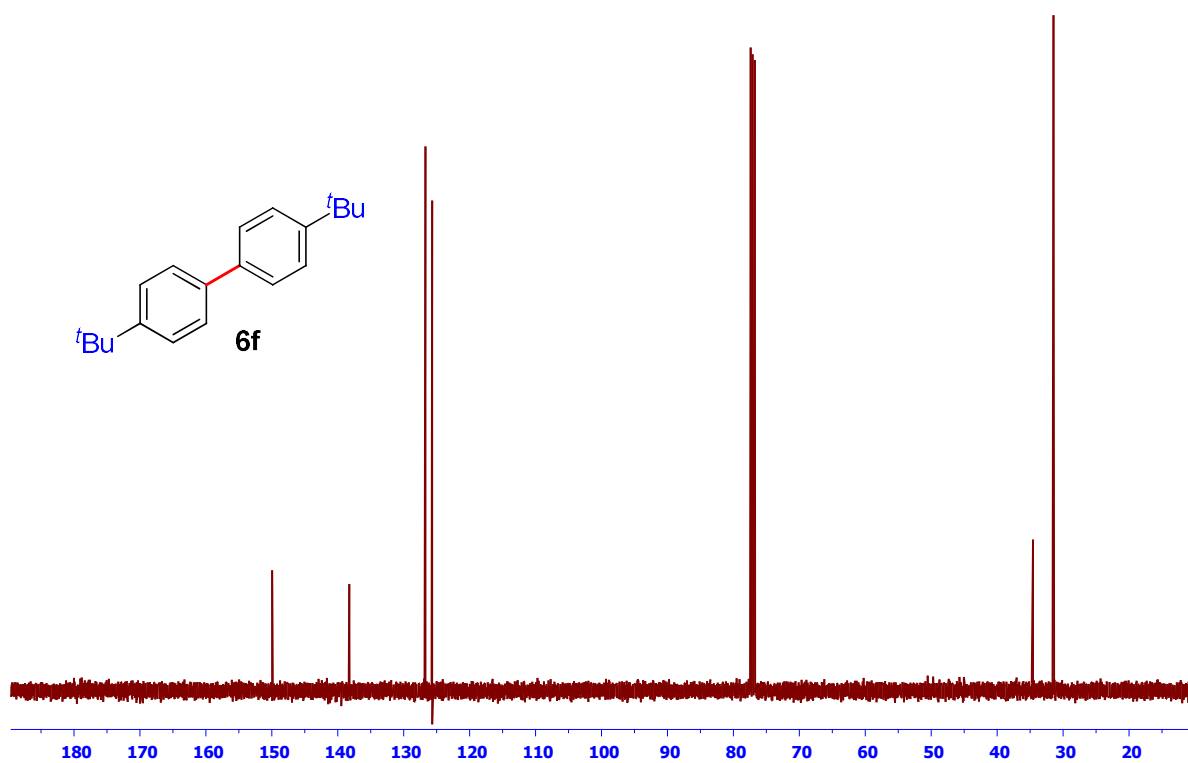

$^1\text{H}$  NMR spectrum of **6h**:

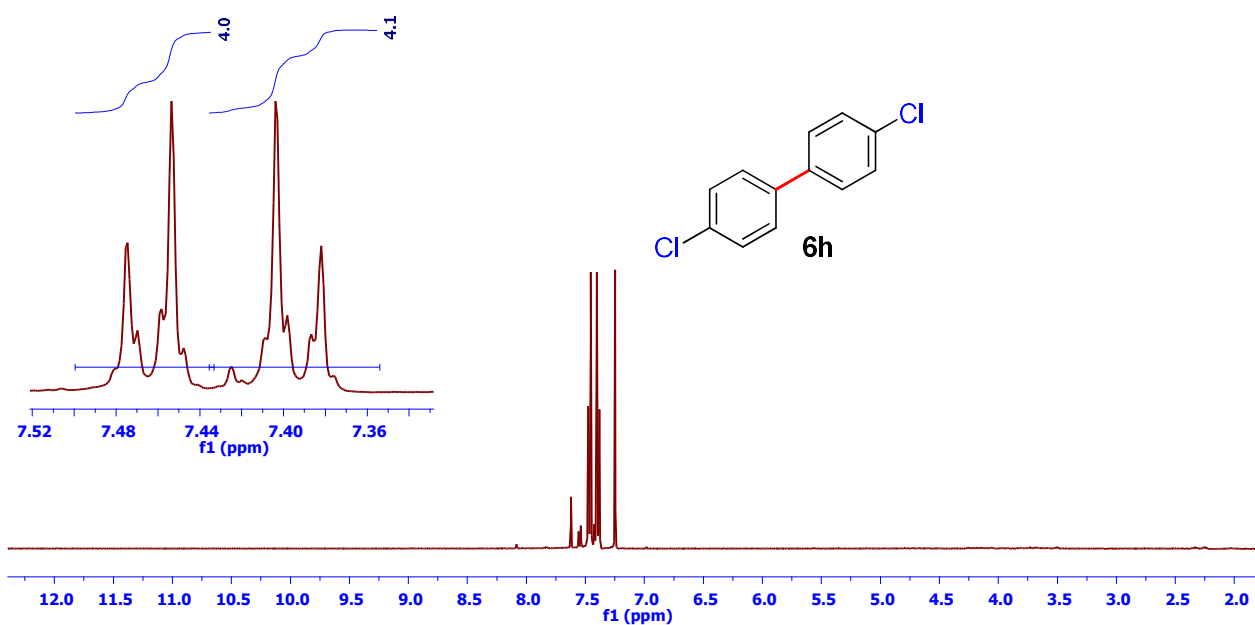

$^{13}\text{C}$  NMR spectrum of **6h**:

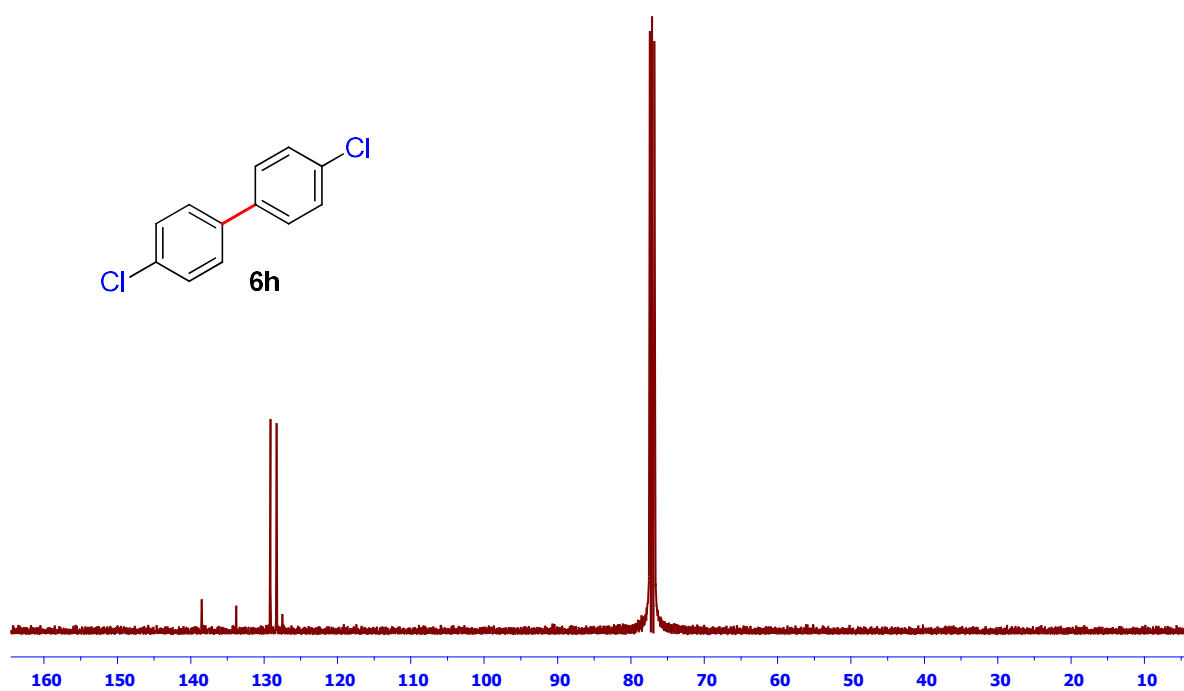

$^1\text{H}$  NMR spectrum of **6m**:

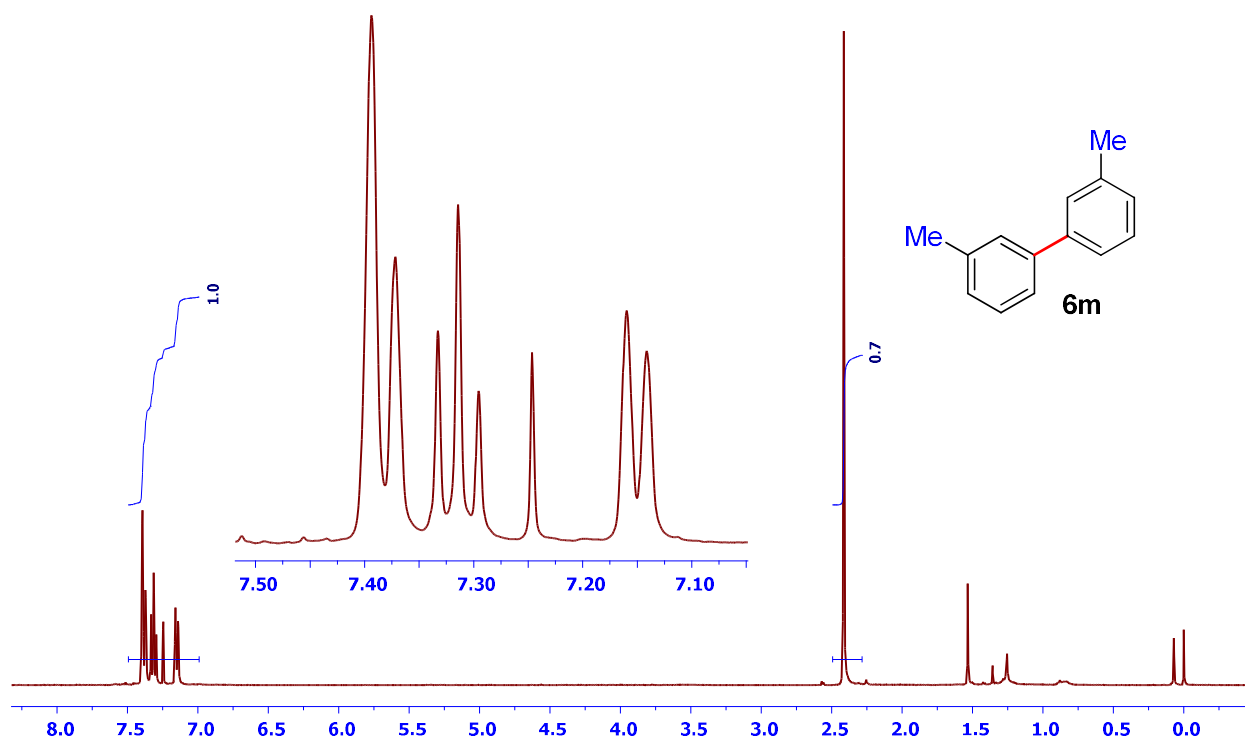

$^{13}\text{C}$  NMR spectrum of **6m**:

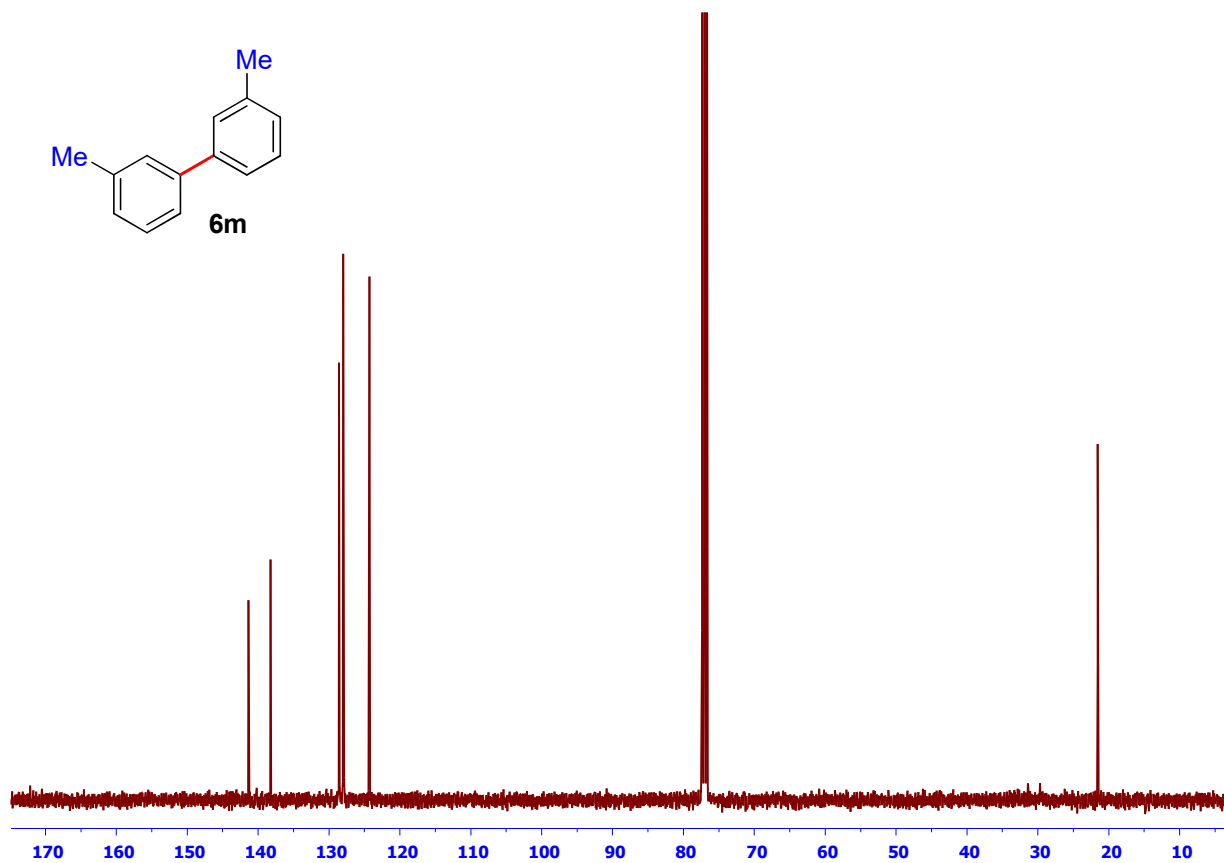

$^1\text{H}$  NMR spectrum of **6q**:

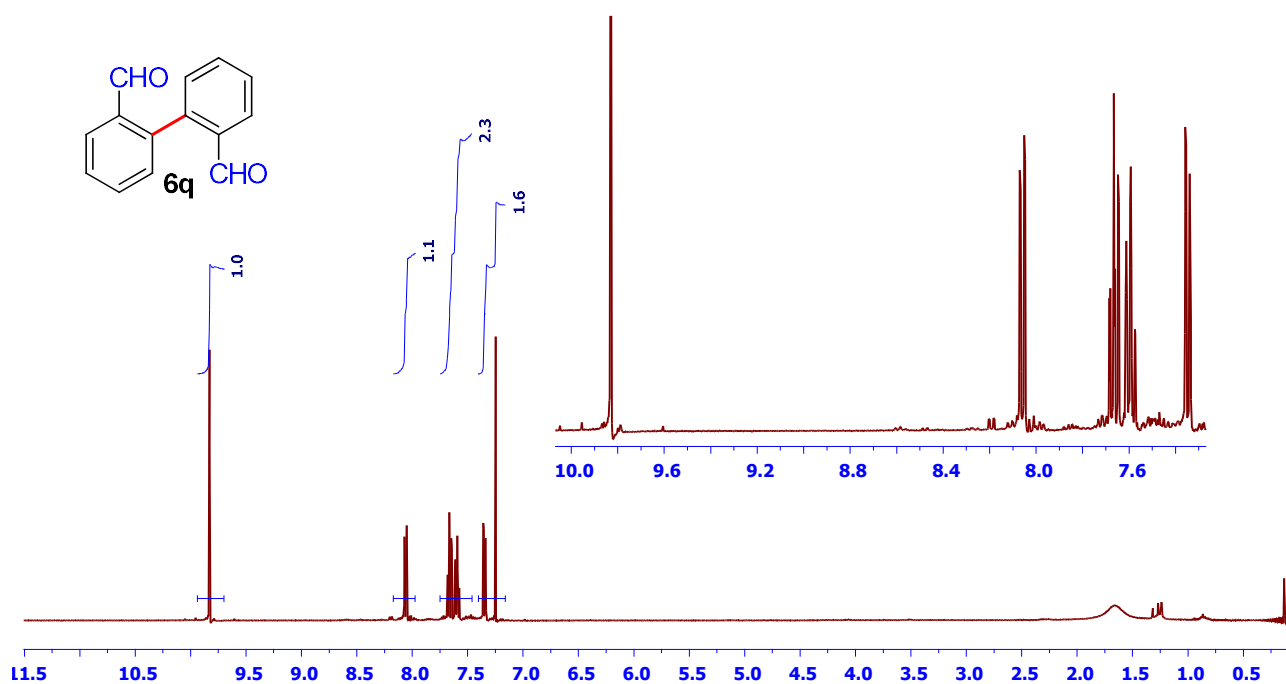

$^{13}\text{C}$  NMR spectrum of **6q**:

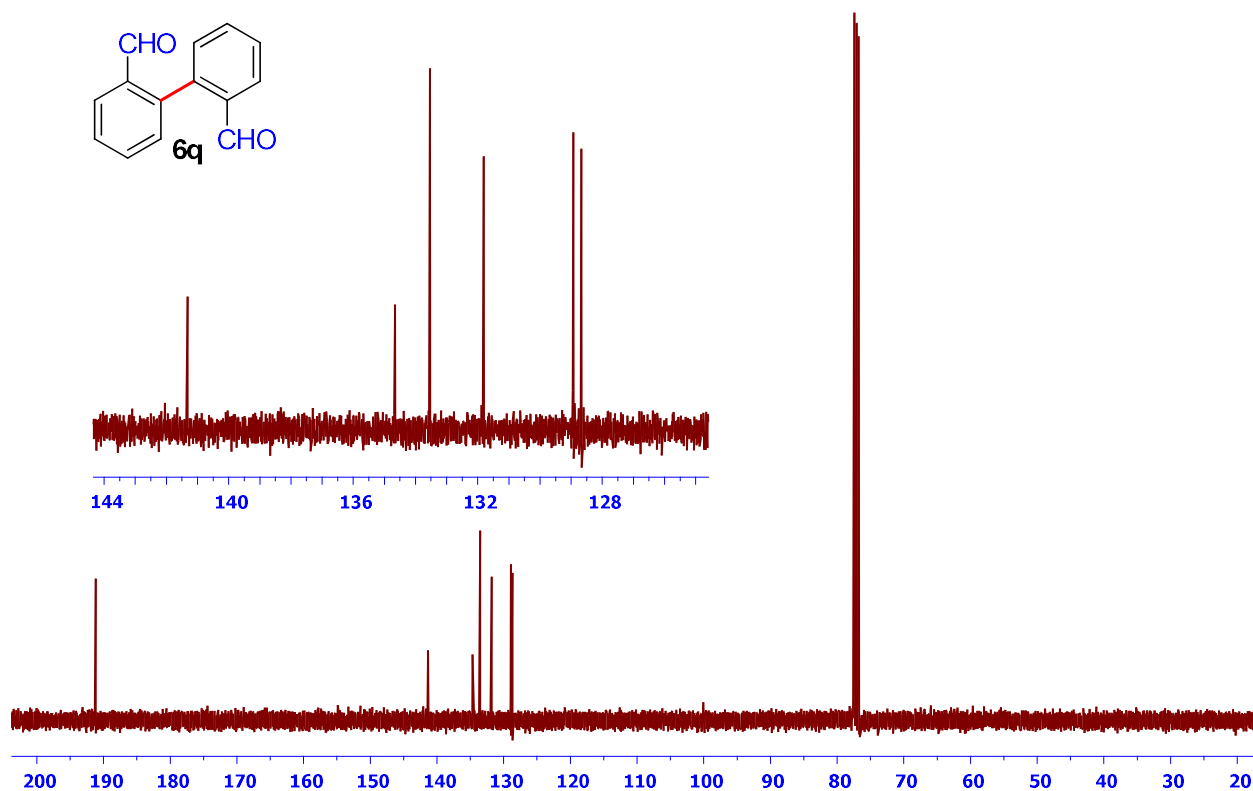

$^1\text{H}$  NMR spectrum of **6u**:

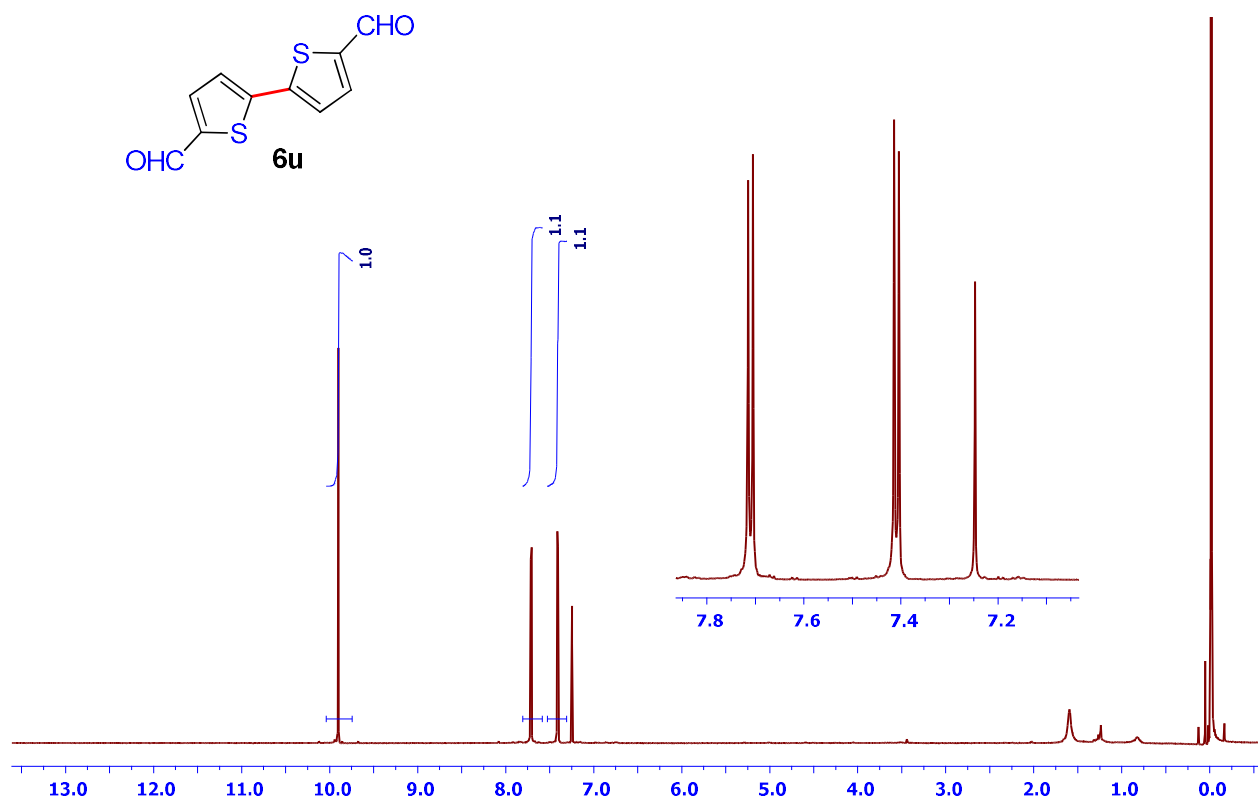

$^{13}\text{C}$  NMR spectrum of **6u**:

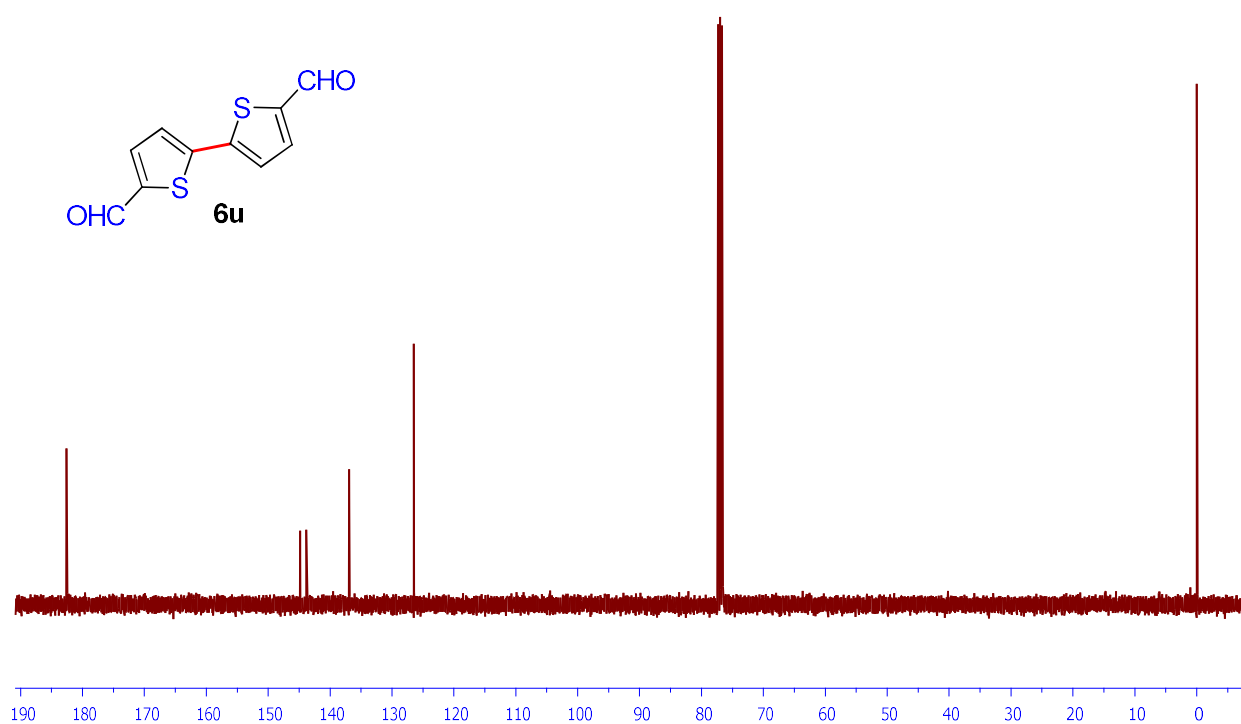

Supplement: s1 [file s1]
